# Supplementary material for: Depressive symptoms and HIV risk behaviours among adolescents enrolled in the HPTN071 (PopART) trial in Zambia and South Africa
Source: PubMed Central journal article supplement (PMC9714741; doi:10.1371/journal.pone.0278291), 2022-12-01
Supplement: pone.0278291.s003.pdf [file pone.0278291.s003.pdf]

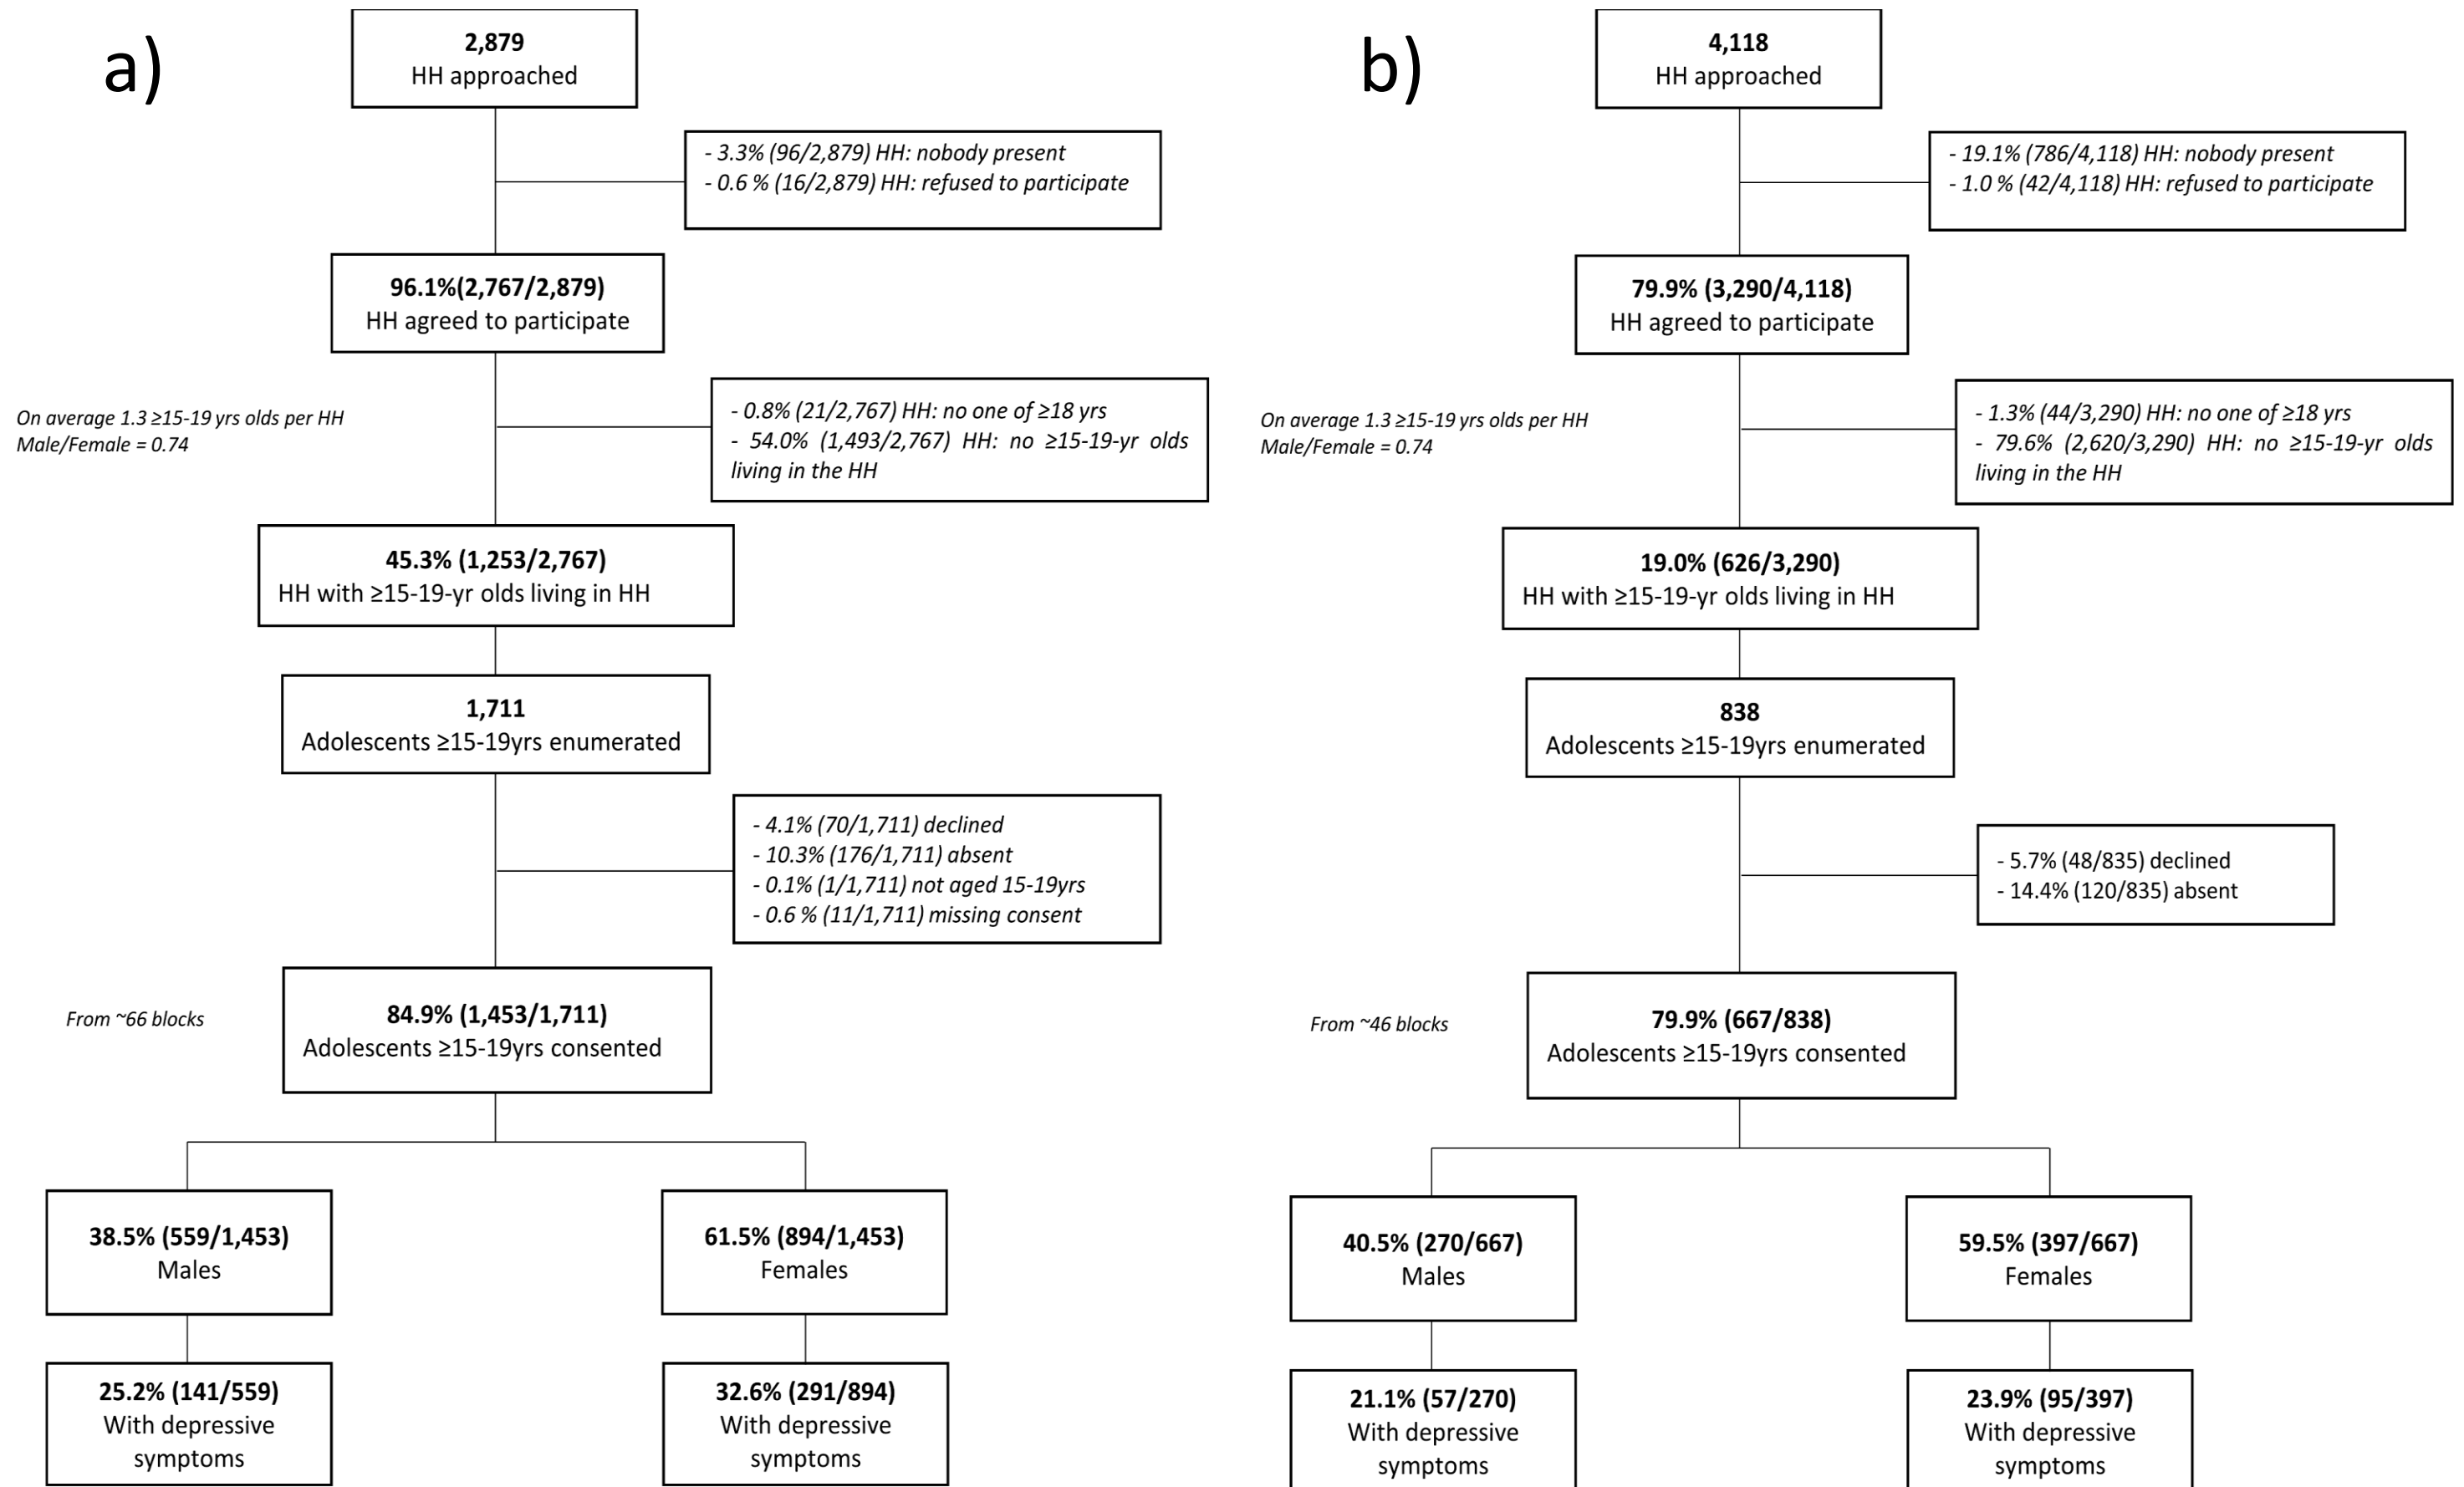

**S3 Fig 1. Study Participation (a) In Zambia (b) In South Africa**

**Note**

HH = Households

Yrs = years
