# Supplementary material for: Depressive symptoms and HIV risk behaviours among adolescents enrolled in the HPTN071 (PopART) trial in Zambia and South Africa
Source: PubMed Central journal article supplement (PMC9714741; doi:10.1371/journal.pone.0278291), 2022-12-01
Supplement: pone.0278291.s004.pdf [file pone.0278291.s004.pdf]

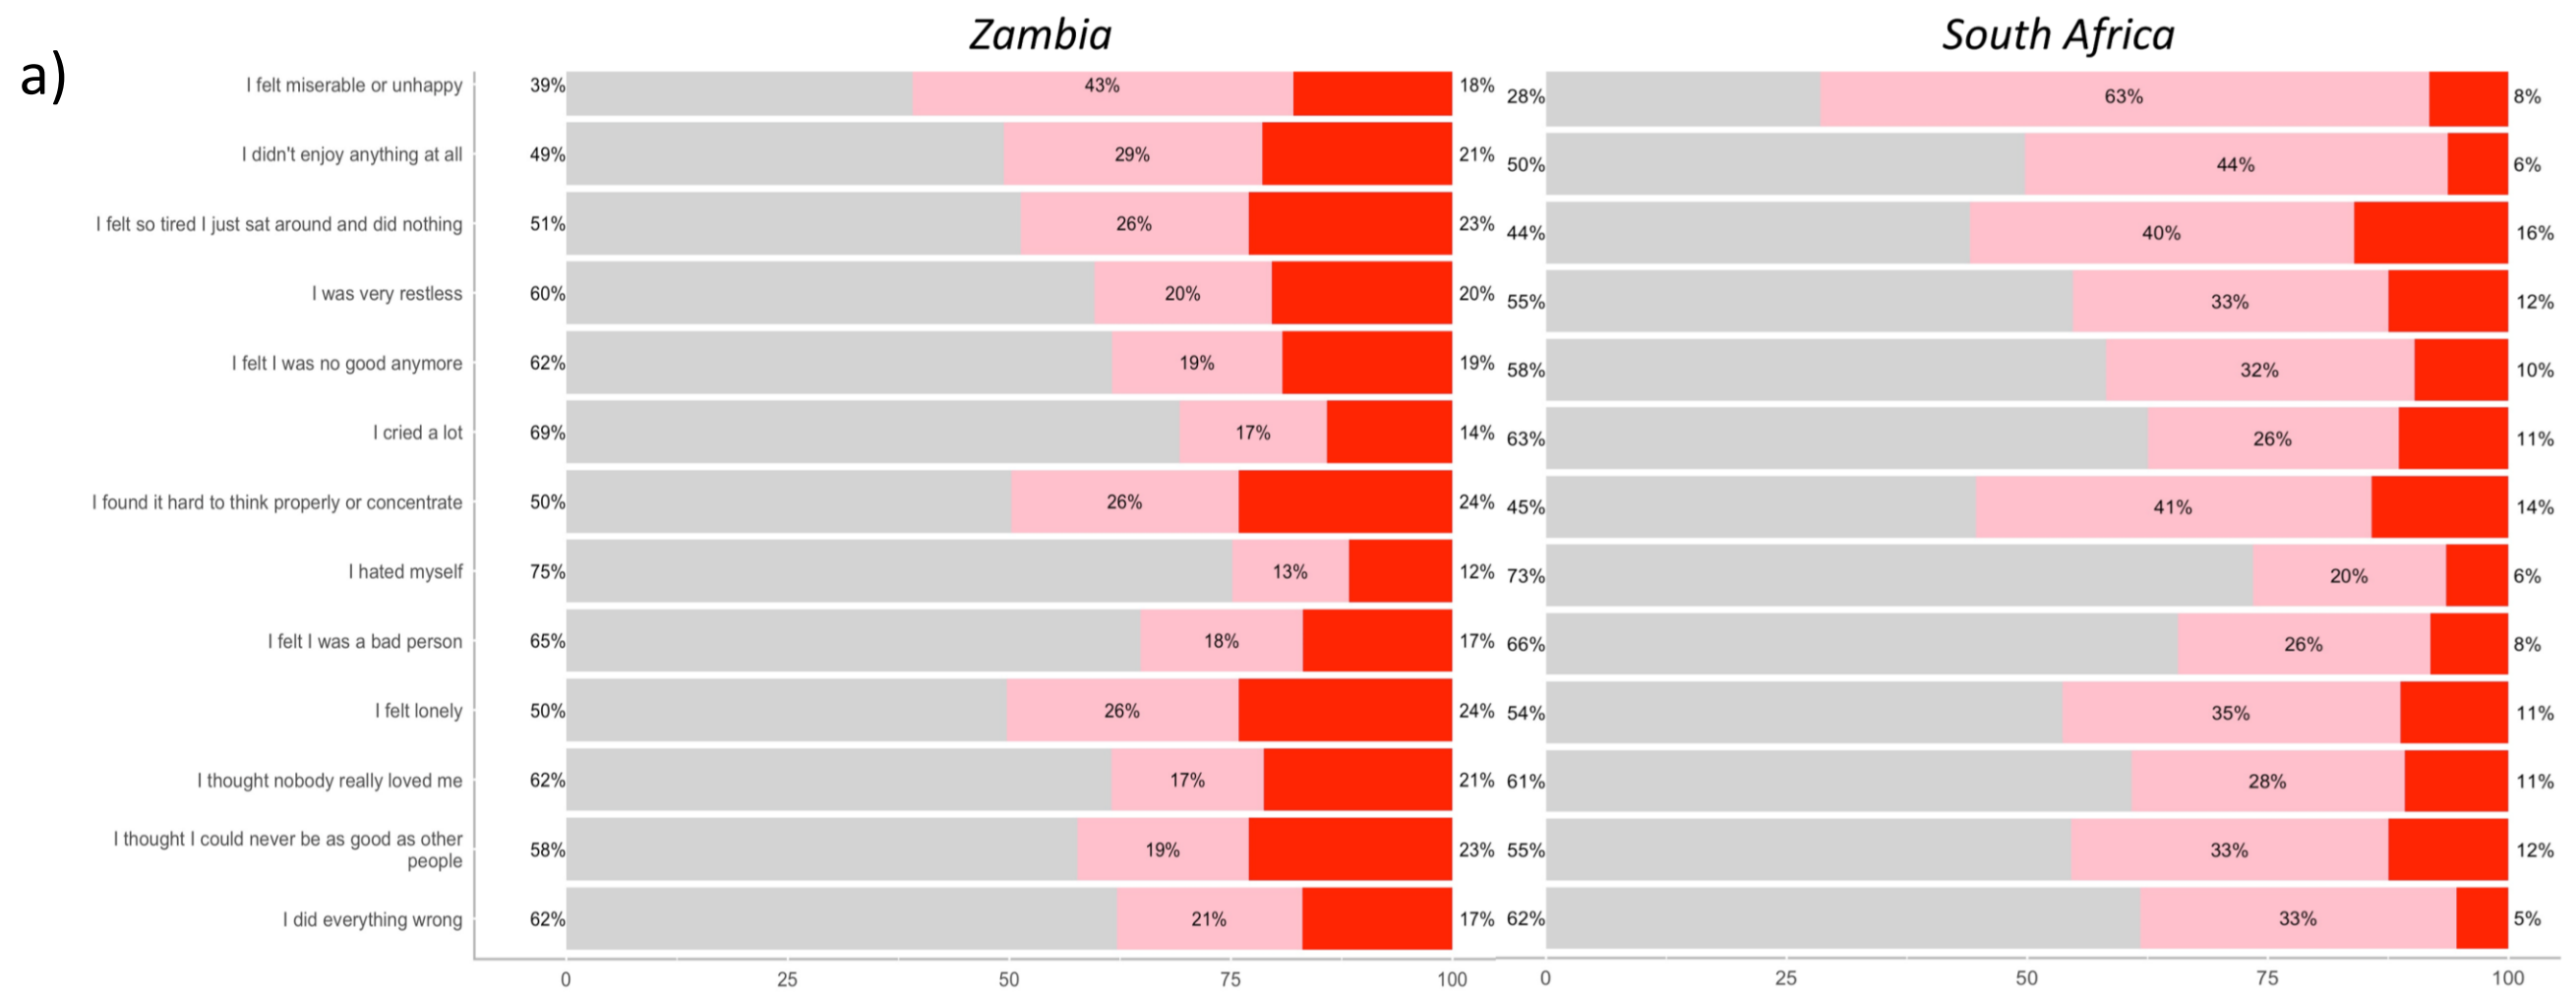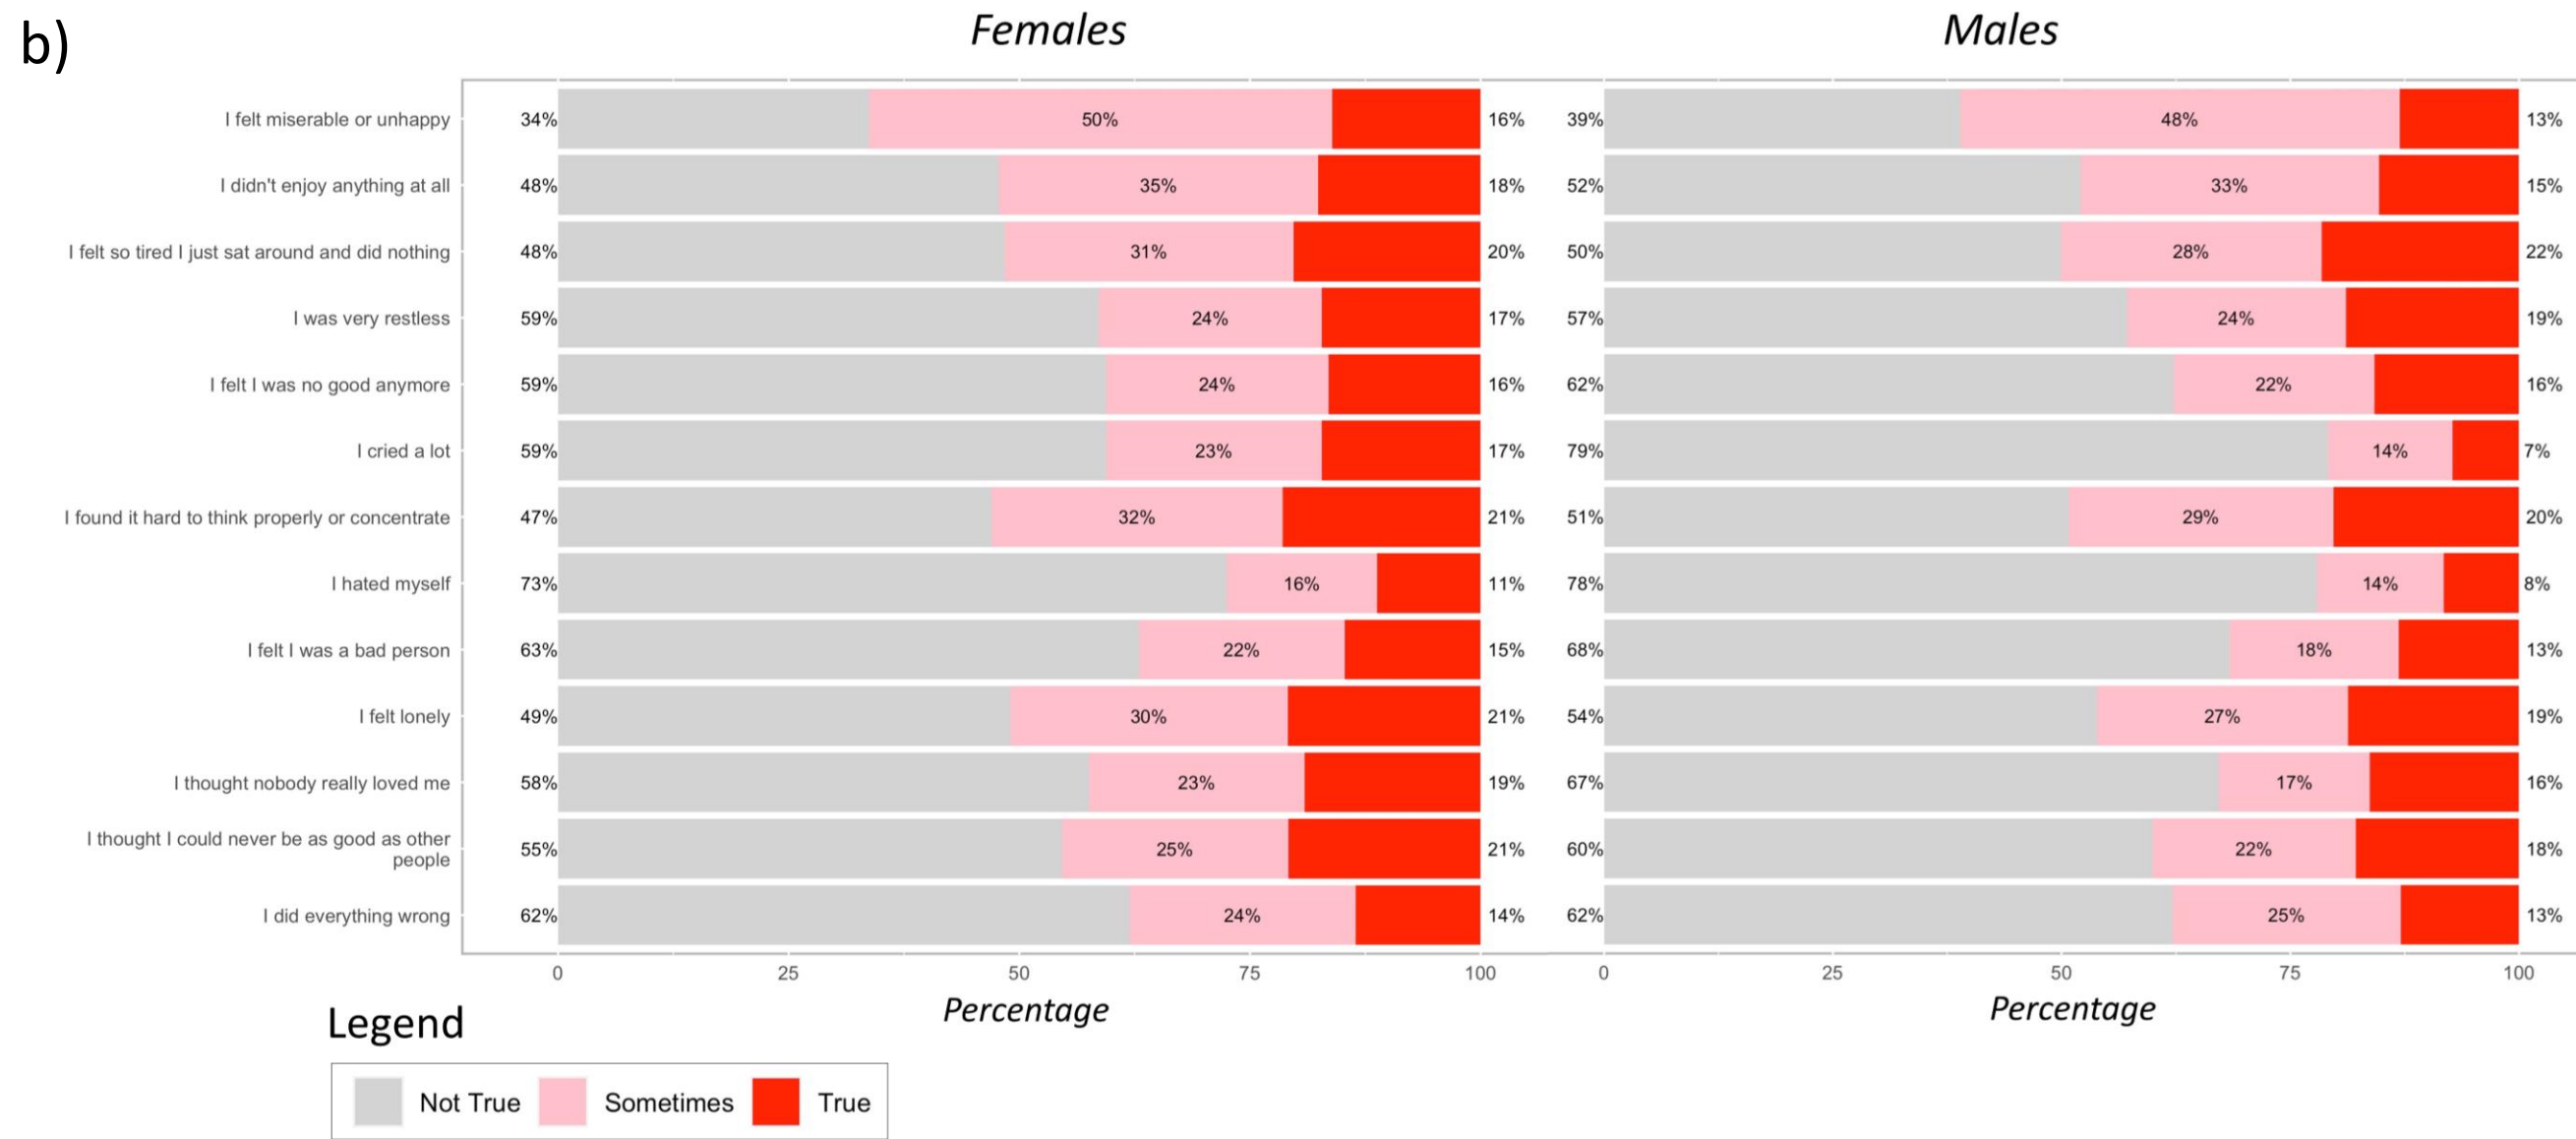

**S4 Fig 2. Frequency distribution of the SMFQ items (in percentage). (a) Stratified by country (b) Stratified by sex**
