# Supplementary material for: Depressive symptoms and HIV risk behaviours among adolescents enrolled in the HPTN071 (PopART) trial in Zambia and South Africa
Source: PubMed Central journal article supplement (PMC9714741; doi:10.1371/journal.pone.0278291), 2022-12-01
Supplement: pone.0278291.s005.pdf [file pone.0278291.s005.pdf]

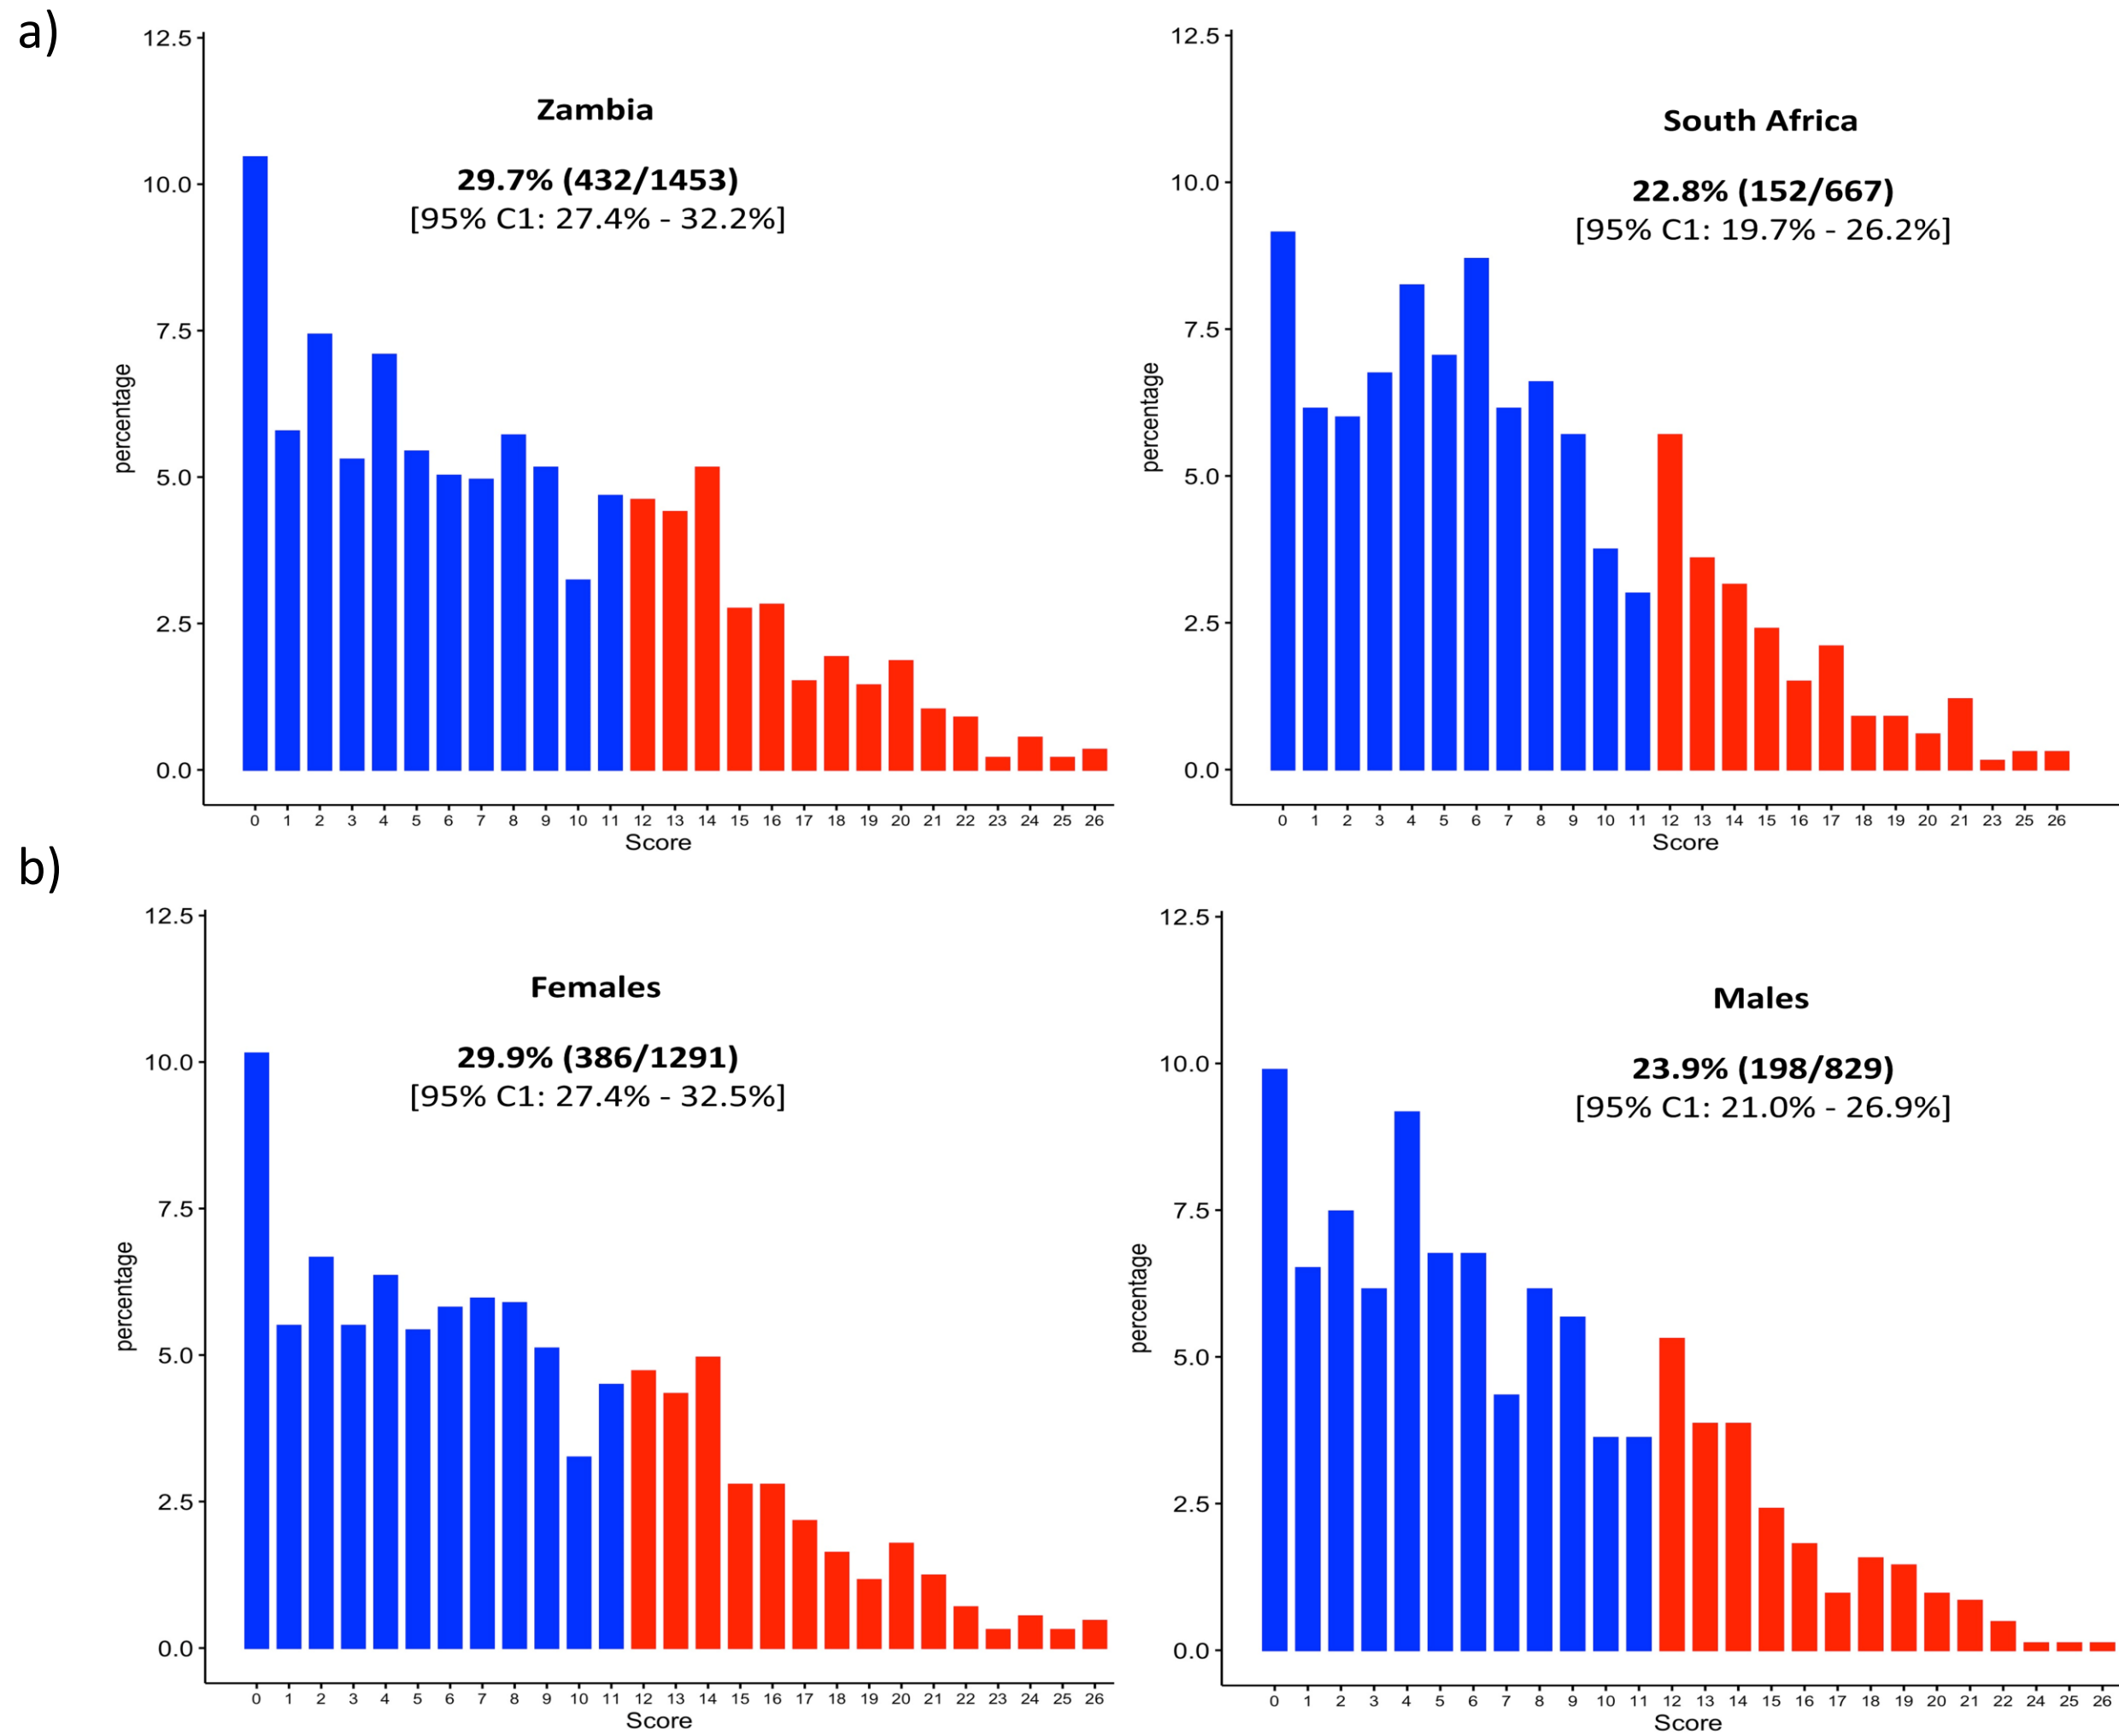

**S5 Fig 3. Prevalence of depressive symptoms using a  $\geq 12$  cut-off value of the SMFQ “0 – 26” scale response. (a) stratified by country (b) stratified by Sex**
