# Supplementary material for: Depressive symptoms and HIV risk behaviours among adolescents enrolled in the HPTN071 (PopART) trial in Zambia and South Africa
Source: PubMed Central journal article supplement (PMC9714741; doi:10.1371/journal.pone.0278291), 2022-12-01
Supplement: pone.0278291.s007.pdf [file pone.0278291.s007.pdf]

*Stratified by Sex*

a)

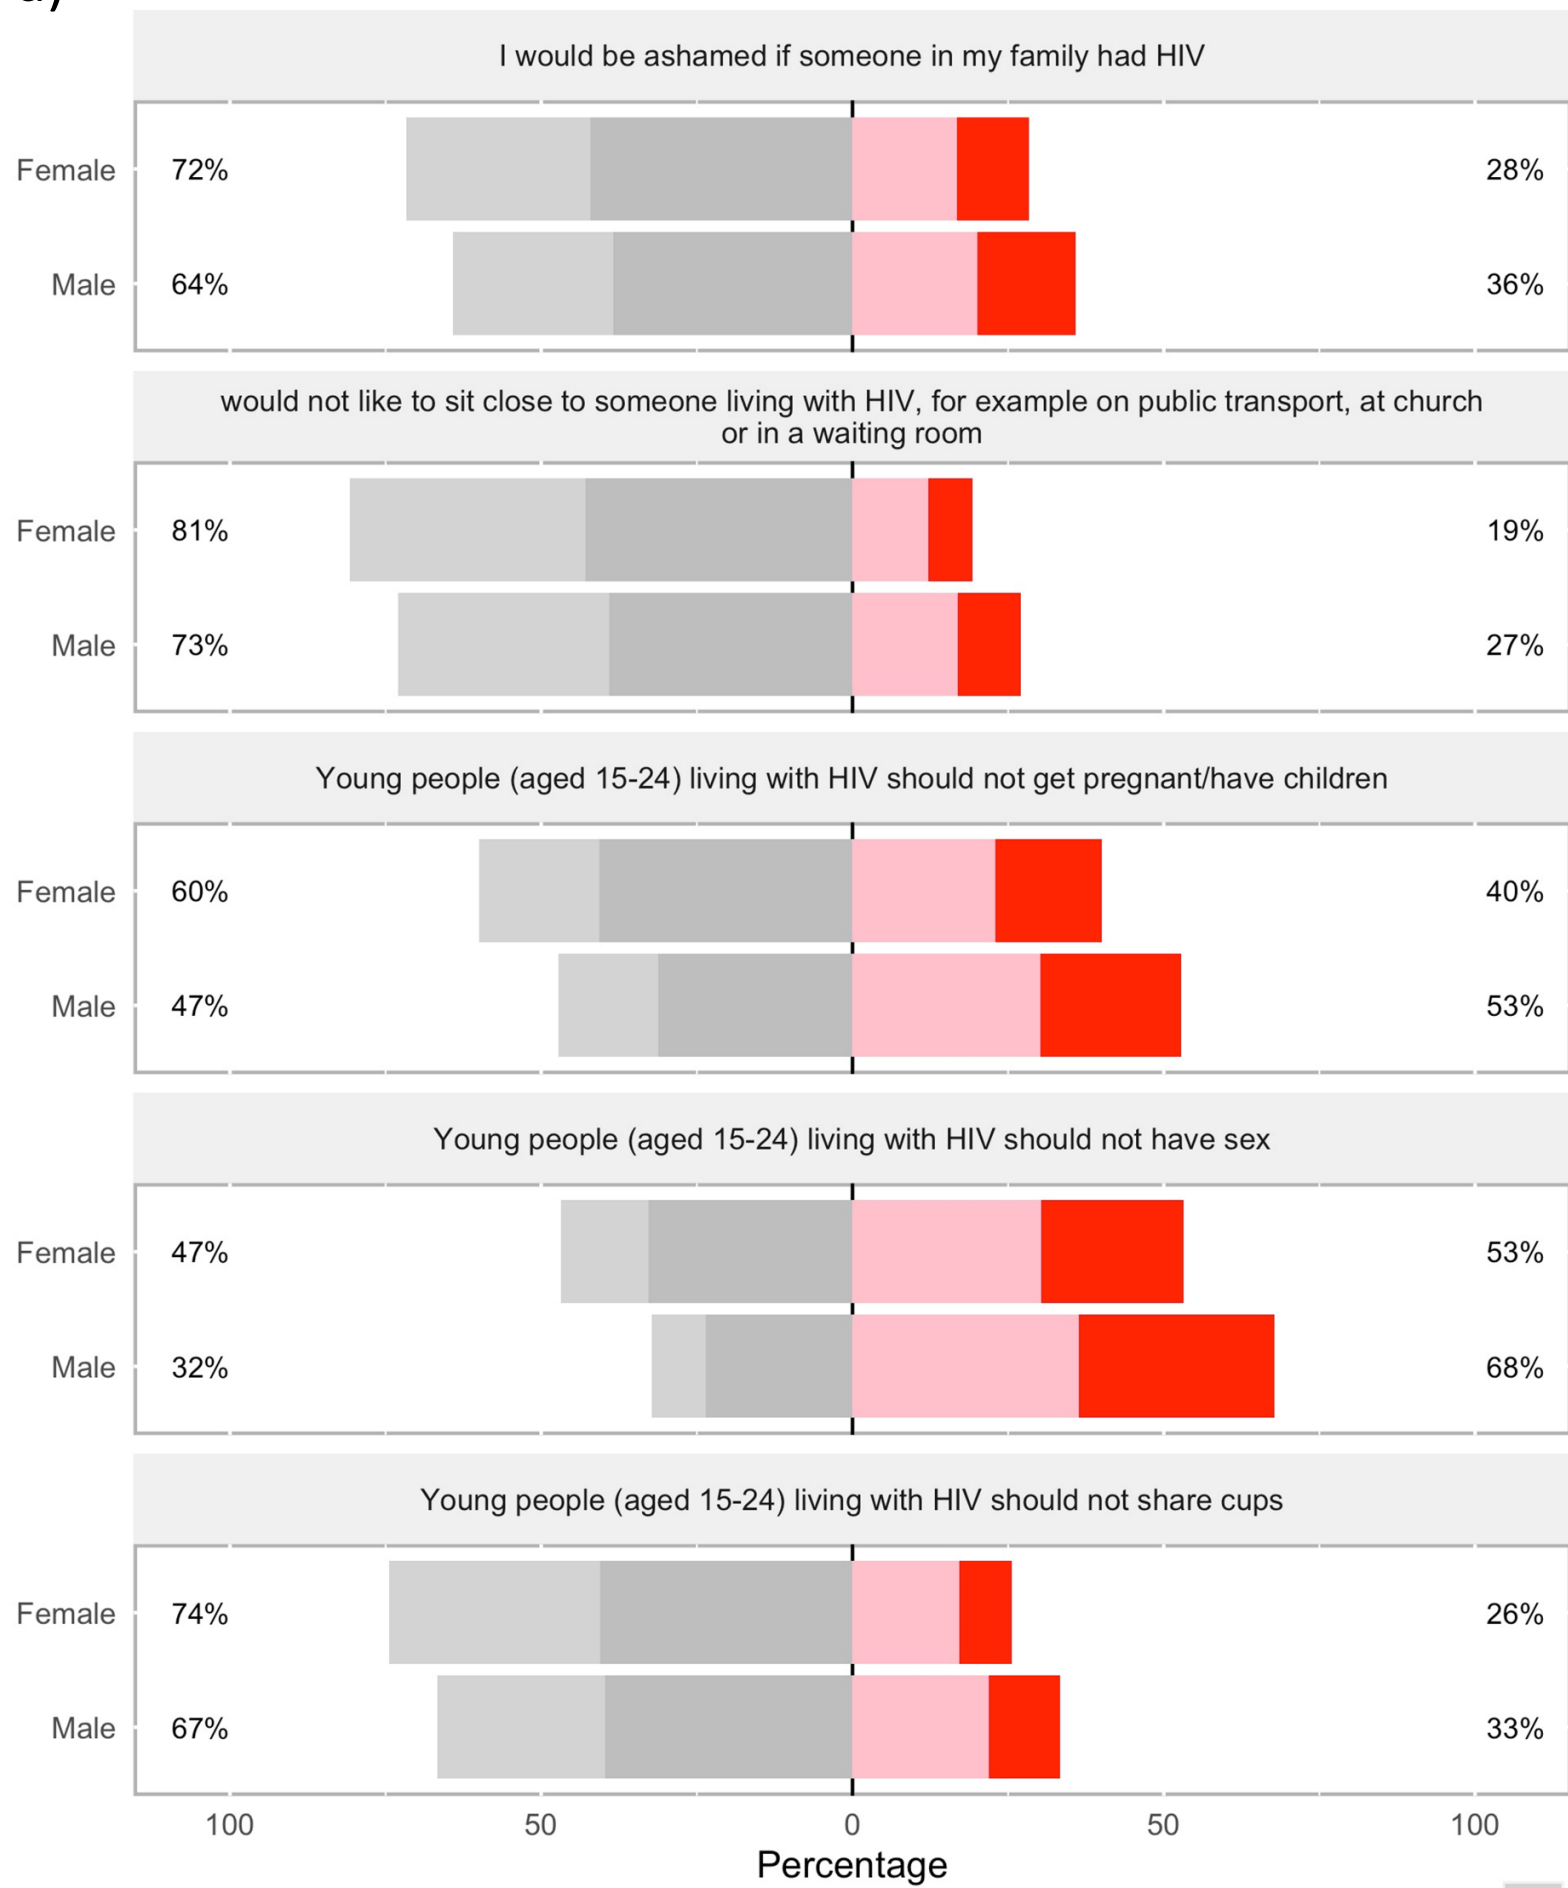

*Stratified by Age*

b)

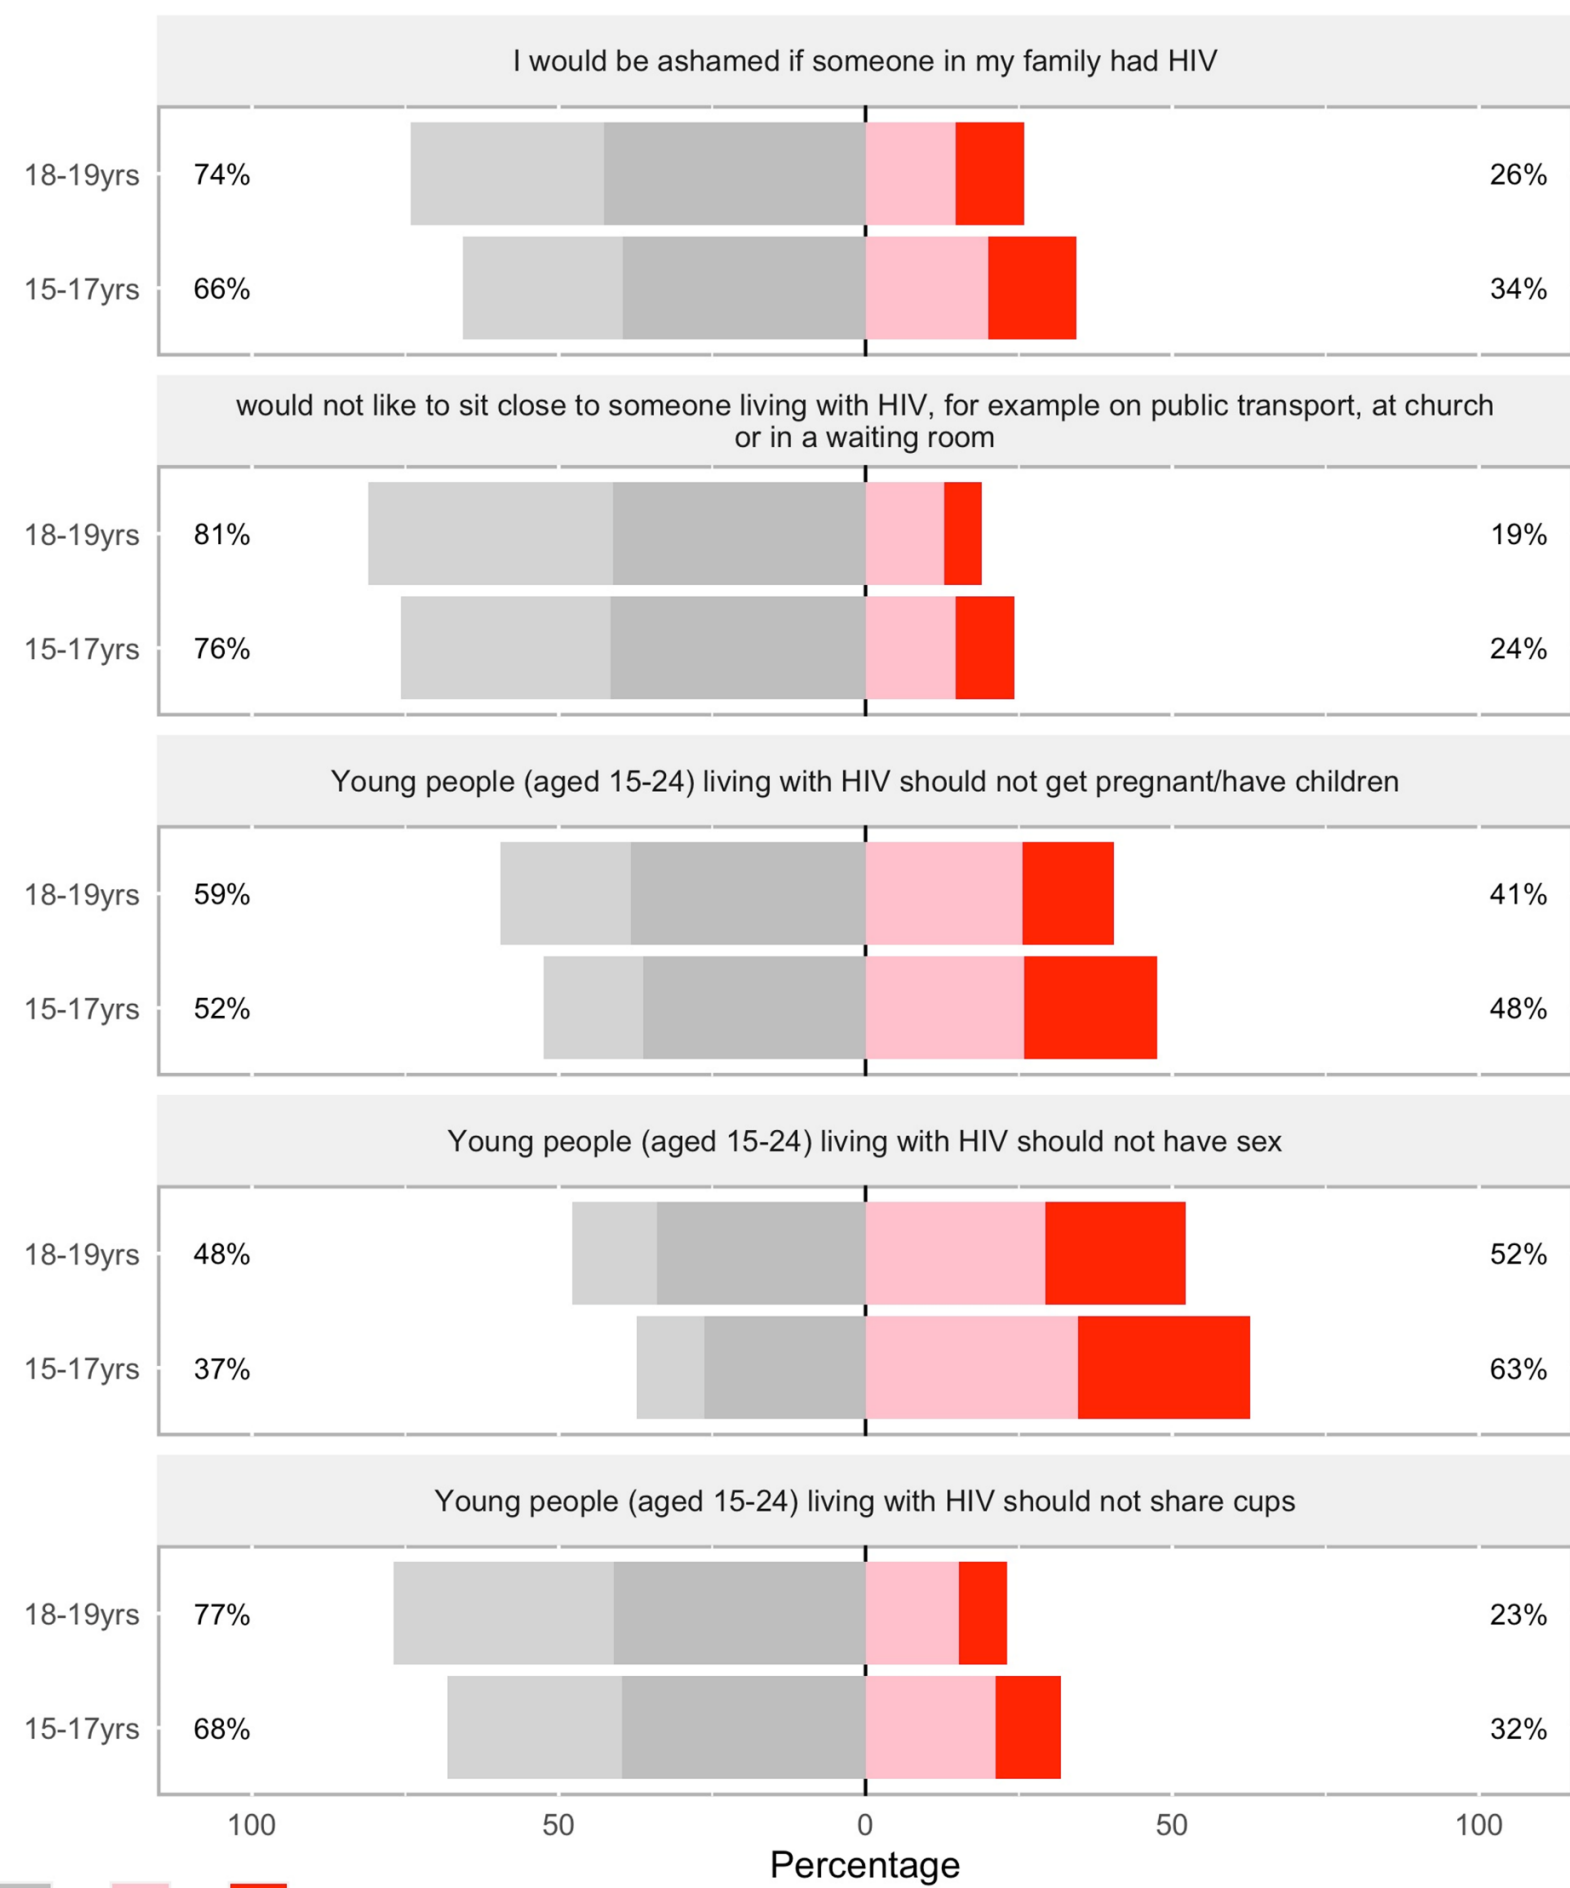

Response 1 2 3 4

**S7 Fig 5: Frequency distribution of the 5 Stigma items responses (in percentage). (a) Stratified by Sex (b) Stratified by Sex Age.**
