# Supplementary material for: Depressive symptoms and HIV risk behaviours among adolescents enrolled in the HPTN071 (PopART) trial in Zambia and South Africa
Source: PLoS One. 2022 Dec 1;17(12):e0278291. doi: 10.1371/journal.pone.0278291 (PMC9714741; doi:10.1371/journal.pone.0278291)
Supplement: S1 Data — (XLSX) [file pone.0278291.s012.xlsx]

## Sheet: Sheet1
country	community	block	count	outcome1	outcome2	no_18_19	no_female	no_tested_12Mplus	no_tested_12Mless	no_none_Incomplete_primary	no_complete_primary	no_incomplete_secondary	no_symptomatic	hiv_at_home	stigma1	ever_had_sex	no_used_condom	substanceuse_lastsex	pregnant	no_circum_decline	no_not_circum	no_circum
Zambia	3	1	17	6	2	5	9	10	4	5	3	7	7	3	7	8	8	0	1	7	1	0
Zambia	3	2	19	7	1	6	10	11	4	4	6	5	9	1	6	7	3	0	1	6	2	0
Zambia	3	3	27	3	1	12	14	15	5	7	6	9	12	2	6	7	4	1	0	3	10	0
Zambia	3	4	19	4	3	4	9	11	4	5	6	7	10	3	4	9	5	0	0	5	4	1
Zambia	3	5	34	8	4	15	22	16	15	8	3	18	14	3	7	9	5	1	0	7	5	0
Zambia	3	6	28	8	0	9	20	11	5	6	4	13	10	1	5	5	5	0	0	4	4	0
Zambia	3	7	33	8	2	12	19	18	5	3	9	14	12	2	5	17	11	1	1	5	8	0
Zambia	3	8	33	10	4	10	16	18	9	12	6	10	10	5	7	9	5	1	1	14	3	0
Zambia	3	9	25	5	2	7	14	11	8	3	3	17	10	1	11	12	7	1	0	5	5	0
Zambia	3	10	25	8	2	13	15	8	9	1	3	18	9	3	6	7	4	0	0	5	4	1
Zambia	3	11	37	14	4	12	28	14	8	3	15	12	12	5	13	16	10	3	0	5	4	0
Zambia	3	12	27	7	2	10	21	9	4	0	8	14	4	3	6	9	1	0	0	3	2	0
Zambia	3	13	14	3	2	5	9	6	5	1	1	8	6	2	1	5	2	1	0	3	2	0
Zambia	3	14	15	4	1	7	9	7	2	1	3	5	5	0	3	6	4	0	0	4	2	0
Zambia	3	15	24	5	1	7	18	14	5	4	3	6	10	0	6	9	4	1	0	4	2	0
Zambia	3	16	11	2	0	3	5	3	2	2	1	4	2	4	3	4	1	0	0	0	6	0
Zambia	3	17	21	6	3	11	10	8	6	3	4	8	7	2	2	11	5	1	1	5	6	0
Zambia	4	18	16	5	2	5	11	9	2	3	5	3	5	0	1	7	3	0	0	0	4	1
Zambia	4	19	7	1	1	3	3	4	2	0	3	0	5	1	1	3	2	1	0	1	1	1
Zambia	4	20	18	7	5	8	10	10	6	0	6	10	6	3	4	9	3	1	0	2	6	0
Zambia	4	21	87	19	6	27	51	58	15	12	28	31	36	8	17	29	16	5	1	9	25	1
Zambia	4	22	24	2	0	10	12	18	4	4	9	9	9	1	8	9	4	0	0	5	6	0
Zambia	4	23	14	4	2	4	8	11	1	3	5	5	4	2	5	4	1	0	0	3	2	1
Zambia	4	24	28	2	1	10	12	18	7	6	10	8	6	3	8	7	4	2	0	3	10	3
Zambia	4	25	31	7	1	15	19	20	6	8	11	9	18	7	10	16	8	1	0	3	9	0
Zambia	4	26	35	8	5	17	24	25	0	2	13	17	13	5	8	6	3	0	0	4	4	3
Zambia	4	27	12	4	2	5	8	6	2	2	4	4	4	3	3	3	1	1	0	1	3	0
Zambia	4	28	30	13	2	18	16	15	7	1	8	12	10	5	5	11	6	1	0	7	5	2
Zambia	4	29	12	6	1	3	10	11	0	0	6	3	3	2	1	5	3	0	2	0	1	1
Zambia	4	30	13	5	1	9	8	6	0	4	3	2	5	1	1	8	4	0	1	1	3	1
Zambia	4	31	25	5	1	11	19	14	7	7	5	9	13	3	5	10	9	1	1	2	4	0
Zambia	4	32	31	11	3	16	19	17	9	4	10	10	13	2	4	14	6	0	0	2	8	2
Zambia	4	33	18	5	3	10	11	8	5	3	5	6	2	2	2	8	6	2	1	1	6	0
Zambia	7	34	22	8	3	5	18	13	5	2	9	8	10	0	3	5	3	0	0	3	1	0
Zambia	7	35	17	7	3	7	9	13	2	5	4	8	10	3	8	8	4	1	0	7	1	0
Zambia	7	36	17	6	3	4	11	11	5	8	2	6	11	2	5	4	2	0	0	5	0	1
Zambia	7	37	31	10	4	11	23	20	5	6	14	9	14	5	18	15	10	5	2	6	0	0
Zambia	7	38	23	8	5	2	15	18	5	6	1	16	7	1	8	4	3	0	0	6	2	0
Zambia	7	39	23	10	0	6	10	12	6	12	2	7	9	2	8	10	4	3	0	5	7	1
Zambia	7	40	26	9	2	9	16	23	0	3	6	17	11	3	12	6	3	1	1	5	5	0
Zambia	7	41	23	6	3	11	16	14	4	5	5	9	9	4	8	7	3	0	0	5	1	1
Zambia	7	42	18	9	3	7	14	10	4	6	1	11	11	0	5	7	4	1	2	4	0	0
Zambia	7	43	21	9	0	9	11	12	2	4	4	6	8	0	5	6	3	0	0	7	3	0
Zambia	7	44	13	5	2	2	10	4	4	4	3	5	3	0	4	5	4	0	1	1	2	0
Zambia	12	45	27	4	1	11	16	15	4	5	4	7	5	2	11	8	3	0	1	5	6	0
Zambia	12	46	25	12	2	9	9	13	3	10	6	8	5	4	14	16	9	4	0	7	8	1
Zambia	12	47	29	10	1	10	20	16	8	9	4	8	0	2	12	5	3	1	0	4	5	0
Zambia	12	48	5	1	0	2	3	1	0	1	0	2	1	0	3	1	1	0	0	2	0	0
Zambia	12	49	18	3	0	6	11	8	5	2	10	3	3	1	6	4	3	0	0	5	2	0
Zambia	12	50	12	6	1	5	11	5	3	0	6	6	4	2	5	4	2	1	1	1	0	0
Zambia	12	51	28	13	4	8	18	17	5	11	11	4	7	1	11	10	5	1	1	6	3	0
Zambia	12	52	24	6	1	12	15	10	3	7	2	9	3	1	6	10	8	0	0	2	6	1
Zambia	12	53	16	5	1	5	10	6	3	3	7	3	1	1	4	6	2	0	0	2	4	0
Zambia	12	54	23	5	0	7	15	5	6	2	10	7	4	8	4	9	2	0	0	3	4	1
Zambia	12	55	10	2	1	6	6	3	1	3	6	1	2	2	2	6	4	1	0	2	2	0
Zambia	12	56	21	8	2	9	16	6	1	8	6	2	4	1	7	11	7	1	0	1	3	0
Zambia	12	57	11	6	1	4	5	4	1	2	2	5	5	1	3	5	4	1	0	3	3	0
Zambia	12	58	6	4	1	1	5	2	1	5	1	0	1	1	4	2	0	0	0	0	1	0
Zambia	12	59	32	12	2	7	20	13	5	9	7	11	6	0	15	10	5	0	2	4	8	0
Zambia	12	60	25	7	0	7	13	8	2	9	6	2	4	2	7	11	5	0	0	6	6	0
Zambia	12	61	8	2	0	3	7	1	1	3	0	3	1	0	2	6	5	2	1	1	0	0
Zambia	12	62	11	2	0	2	5	6	1	7	1	1	3	2	6	1	1	0	0	2	3	1
Zambia	12	63	27	9	3	11	11	12	1	8	4	6	4	0	10	12	10	1	0	2	13	0
Zambia	12	64	17	7	2	4	12	2	5	7	4	6	4	2	6	7	6	0	0	1	4	0
Zambia	12	65	18	4	1	9	12	3	2	5	5	3	5	2	3	9	4	0	1	1	4	1
Zambia	12	66	16	5	1	8	12	4	2	4	8	1	5	3	6	10	6	1	0	2	2	0
South-Africa	15	67	16	2	0	6	10	7	6	1	4	10	4	2	3	7	6	1	1	3	0	0
South-Africa	15	68	13	3	0	7	7	3	3	0	4	6	2	3	3	8	4	3	1	3	0	1
South-Africa	15	69	4	1	0	1	1	2	0	0	2	1	2	2	0	3	3	0	0	2	0	0
South-Africa	15	70	23	6	1	8	12	7	5	3	11	6	9	3	6	9	5	1	0	7	0	2
South-Africa	15	71	19	2	0	4	15	3	6	1	4	12	6	2	7	10	7	1	0	3	1	0
South-Africa	15	72	6	1	0	2	6	4	2	1	3	0	0	1	1	1	0	0	0
South-Africa	15	73	28	7	1	10	21	7	3	2	11	9	0	3	5	14	9	3	1	6	0	0
South-Africa	15	74	1	0	0	0	1	0	0	1	0	0	0	0	0	0			0
South-Africa	15	75	17	5	0	6	10	3	2	3	2	10	1	0	2	12	5	0	0	5	0	1
South-Africa	15	76	8	3	0	6	3	4	1	2	1	3	3	1	3	5	3	0	0	4	0	0
South-Africa	15	77	11	2	1	6	7	6	2	0	2	2	4	1	3	9	5	1	0	2	0	0
South-Africa	15	78	17	6	2	9	7	6	1	1	5	6	3	5	6	7	4	1	0	7	0	3
South-Africa	15	79	7	3	0	3	4	3	1	0	3	3	0	1	1	5	5	0	1	3	0	0
South-Africa	15	80	18	6	2	8	13	2	5	2	4	7	0	2	2	8	6	1	0	2	0	1
South-Africa	15	81	7	1	1	5	4	0	3	1	2	1	1	0	2	3	2	1	1	3	0	0
South-Africa	15	82	19	7	0	6	13	3	2	2	6	9	7	4	2	11	10	1	1	4	0	1
South-Africa	15	83	16	7	2	5	12	1	4	1	8	4	0	2	2	6	5	0	0	3	0	0
South-Africa	17	84	11	4	0	5	6	5	1	1	1	3	5	1	3	6	4	1	0	3	0	1
South-Africa	17	85	19	7	3	7	14	7	3	1	5	8	8	1	5	12	3	1	2	3	0	2
South-Africa	17	86	87	21	8	41	58	29	13	8	21	39	19	8	20	39	29	3	3	21	0	3
South-Africa	17	87	15	3	0	4	8	6	1	3	5	5	2	1	6	7	5	0	1	3	0	1
South-Africa	17	88	11	1	0	1	8	6	1	2	3	6	2	1	5	6	4	0	0	2	0	0
South-Africa	17	89	1	0	0	1	1	0	1	0	0	1	0	0	0	1	1	0	0
South-Africa	17	90	19	5	1	5	16	10	4	1	5	9	9	5	6	8	5	0	0	2	0	1
South-Africa	17	91	10	3	0	3	5	4	1	0	3	7	3	1	3	5	1	0	0	4	0	0
South-Africa	17	92	23	6	0	8	15	8	6	6	6	6	9	0	10	9	5	1	0	5	1	1
South-Africa	17	93	4	1	0	0	1	2	2	1	1	2	2	1	3	1	1	1	0	1	0	0
South-Africa	17	94	8	5	0	3	4	5	1	1	3	4	3	1	1	4	2	1	0	1	0	2
South-Africa	21	95	1	0	0	0	0	1	0	0	1	0	0	0	0	0				1	0	0
South-Africa	21	96	24	4	0	6	15	15	2	2	4	16	3	2	9	10	7	4	0	7	2	0
South-Africa	21	97	20	1	0	4	9	9	5	1	4	10	4	4	12	8	8	4	0	5	5	0
South-Africa	21	98	5	3	2	0	2	4	0	0	0	4	0	0	1	3	3	1	0	2	0	0
South-Africa	21	99	20	4	1	9	9	16	3	1	3	13	10	2	10	10	6	1	0	7	3	0
South-Africa	21	100	19	3	2	8	10	10	2	0	4	13	9	0	11	12	6	2	1	6	2	1
South-Africa	21	101	10	1	0	1	6	6	2	0	1	8	5	0	6	3	1	1	0	0	4	0
South-Africa	21	102	14	3	0	4	2	8	4	0	1	8	4	2	11	8	6	2	0	5	6	0
South-Africa	21	103	11	1	0	4	7	7	0	1	3	6	4	2	7	4	1	1	0	3	1	0
South-Africa	21	104	2	0	0	1	2	2	0	0	0	1	0	0	2	1	1	0	0
South-Africa	21	105	15	2	1	7	4	11	3	0	3	8	3	2	8	8	5	1	0	6	4	0
South-Africa	21	106	22	3	0	8	19	16	3	0	3	13	6	0	9	8	5	2	0	2	1	0
South-Africa	21	107	13	0	0	6	7	6	3	0	0	6	1	0	2	5	5	1	0	5	0	0
South-Africa	21	108	13	0	0	5	5	10	2	0	3	5	5	0	8	3	2	0	0	3	4	1
South-Africa	21	109	4	1	0	2	2	3	1	0	2	1	2	0	0	0			0	1	0	0
South-Africa	21	110	1	1	0	0	1	1	0	0	1	0	0	0	0	0			0
South-Africa	21	111	23	4	1	8	10	18	3	0	7	9	14	0	12	8	6	1	0	9	2	2
South-Africa	21	112	12	3	0	4	5	8	2	0	2	5	4	1	6	4	2	1	0	6	0	0
