# Supplementary material for: Depressive symptoms and HIV risk behaviours among adolescents enrolled in the HPTN071 (PopART) trial in Zambia and South Africa
Source: PLoS One. 2022 Dec 1;17(12):e0278291. doi: 10.1371/journal.pone.0278291 (PMC9714741; doi:10.1371/journal.pone.0278291)
Supplement: S2 Data — (XLSX) [file pone.0278291.s013.xlsx]

## Sheet: Sheet1
Variable	definition
count	Number of participants per block
outcome1	Score ≥12
outcome2	Score ≥18
no_18_19	number of participants aged between 18-19 per block
no_female	Number of female participants per block
no_tested_12Mplus	Number of participants last tested for HIV in > 12 months per block
no_tested_12Mless	Number of participants last tested for HIV in ≤ 12 months per block
no_none_Incomplete_primary	Number of participants with no/incomplete primary education per block
no_complete_primary	Number of participants with complete primary education per block
no_incomplete_secondary	Number of participants with incomplete secondary education per block
no_symptomatic	Number of participants who have symptoms suggestive of TB or on TB treatment per block
hiv_at_home	Number of participants who are Staying with a HIV positive adult or child per block
stigma1	Number of participants who have Stigmatizing attitude towards others per block
ever_had_sex	Number of participants who ever had sex per block
no_used_condom	Number of participants who used condom in their last sexual encounter per block
substanceuse_lastsex	Number of participants who used alcohol/drugs during their last sexual encounter per block
pregnant	Number of female participants who were currently pregnant per block
no_circum_decline	Number of male participants who declined to answer if they had been circumcised per block
no_not_circum	Number of male participants who said that they were not circumcised per block
no_circum	Number of male participants who said that they were circumcised per block
